# Supplementary material
Source: Elsevier journal article supplement (https://www.sciencedirect.com/science/article/pii/S2173574319300929)
Supplement: mmc1 [file S2173574319300929:mmc1.docx]

**Anexo 1**

**Grupo de Trabajo del Proyecto REAPSER**

Xavier Juanola (Hospital Universitario de Bellvitge), Jordi Fiter (Hospital Universitario Son Espases)*,* Andrés Lorenzo Martín (Hospital Universitario Central de Asturias), Pablo Coto Segura (Hospital Universitario Central de Asturias), Anna López Ferrer (Hospital de la Santa Creu i Sant Pau), Silvia Pérez Barrio (Hospital Universitario Basurto), Andrés Julián Plata Izquierdo (Hospital Clínico Universitario de Salamanca), Francisco José Guimerá Martín-Neda (Hospital Universitario de Canarias), Eduardo Fonseca Capdevilla (Complexo Hospitalario Universitario A Coruña), Ana Pitarch Archelos (Hospital Universitario General de Castellón), Raquel Rivera Díaz (Hospital Universitario 12 Octubre), Mercè Alsina Gibert (Hospital Clinic i Provincial), Isabel de la Morena Barrio (Hospital Clínico Universitario de Valencia), Laura Puchades Lanza (Hospital Clínico Universitario de Valencia), Diego Bedoya Sanchís (Hospital Clínico Universitario de Valencia), Senén González Suárez (Hospital de Cabueñes), Lucía Palacio Aller (Hospital de Cabueñes), Catalina Meliá Mesquida (Hospital Son Llàtzer), Claudia Murillo (Hospital Son Llàtzer), Paloma Sánchez-Pedreño Guillén (Hospital Clínico Universitario Virgen de la Arrixaca), Pablo de la Cueva Dobao (Hospital Universitario Infanta Leonor), Ánder Zulaica Gárate (Complexo Hospitalario Universitario de Vigo), Rafael Melero (Complexo Hospitalario Universitario de Vigo), Jaime Notario Rosa (Hospital Universitari de Bellvitge), Ricardo Valverde Garrido (Hospital Universitario Infanta Sofía), Dunia Luján (Complejo Hospitalario Universitario Insular Materno-Infantil), Alejandro Muñoz Jiménez (Hospital Universitario Virgen del Rocío), Lourdes Rodríguez Fernández-Freire (Hospital Universitario Virgen del Rocío), Carolina Sanz Muñoz (Hospital Clínico Universitario de Valladolid), Jesus Luelmo Aguilar (Hospital Universitari Parc Taulí), Francisco Javier Mataix Díaz (Hospital Marina Baixa), Juan Gabriel Ovalles Bonilla (Hospital Universitario Gregorio Marañón), Ofelia Baniandrés Rodríguez (Hospital Universitario Gregorio Marañón), Trinidad Pérez Sandoval (Complejo Asistencial Universitario de León), Noemí Eirís Salvado (Complejo Asistencial Universitario de León), Ana María Carrizosa Esquivel (Hospital Universitario Virgen Macarena), Sergi Heredia Martín (Hospital Moisès Broggi/Hospital General de L’Hospitalet), Gisela Hebe Petiti (Hospital Moisès Broggi/Hospital General de L’Hospitalet), Laura García Fernández (Hospital General Universitario de Elda), Rocío Caño Alameda (Hospital General Universitario de Alicante), Isabel Belinchón Romero (Hospital General Universitario de Alicante), Silvia Gómez Sabater (Hospital General Universitario de Alicante), Marta Serra Torres (Hospital Can Misses), José Javier Pérez Venegas (Hospital Jerez de la Frontera), Juan Márquez Enríquez (Hospital Jerez de la Frontera), Irene López Barragán (Hospital Jerez de la Frontera), José Luis López Estebaranz (Hospital Universitario Fundación Alcorcón), María del Mar Muñoz Gómez (Hospital Universitario San Cecilio), Marta Novella Navarro (Hospital Universitario San Cecilio), Jose Luis Ruiz Carrascosa (Hospital Universitario San Cecilio), María Dolores López Montilla (Hospital Universitario Reina Sofía)
